# Supplementary material for: C-reactive protein concentrations are higher in dogs with stage IV chronic kidney disease treated with intermittent hemodialysis
Source: PubMed Central journal article supplement (PMC9499245; doi:10.1371/journal.pone.0274510), 2022-09-22
Supplement: pone.0274510.s001.pdf [file pone.0274510.s001.pdf]

**Values behind the means, standard deviations and other measures reported**

**Weight, Age, Sex and Survival:**

| <b>Group</b> | <b>Age (years)</b> | <b>Weight (Kg)</b> | <b>Sex</b> | <b>Survival (days)</b> |
|--------------|--------------------|--------------------|------------|------------------------|
| <b>IHG 1</b> | 8                  | 18.7               | Male       | 24                     |
| <b>IHG 2</b> | 13                 | 11.35              | Female     | 23                     |
| <b>IHG 3</b> | 11                 | 21                 | Female     | 78                     |
| <b>IHG 4</b> | 9                  | 37                 | Female     | 13                     |
| <b>IHG 5</b> | 12                 | 15.5               | Male       | 65                     |
| <b>IHG 6</b> | 7                  | 40.2               | Male       | 78                     |
| <b>IHG 7</b> | 10                 | 21.25              | Male       | 28                     |
| <b>IHG 8</b> | 13                 |                    | Female     | 11                     |
| <b>CTG 1</b> | 7                  | 12.6               | Female     | 7                      |
| <b>CTG 2</b> | 12                 | 11.3               | Male       | 73                     |
| <b>CTG 3</b> | 6                  | 16.95              | Male       | 33                     |
| <b>CTG 4</b> | 12                 |                    | Male       | 7                      |
| <b>CTG 5</b> | 10                 | 21.8               | Male       | 14                     |
| <b>CTG 6</b> | 7                  | 25.75              | Male       | 2                      |
| <b>CTG 7</b> | 14                 | 25.3               | Male       | 21                     |
| <b>CTG 8</b> | 8                  | 37.5               | Male       | 8                      |
| <b>CG 1</b>  | 3                  | 21.15              | Female     | Not applicable         |
| <b>CG 2</b>  | 6                  | 18.75              | Female     |                        |
| <b>CG 3</b>  | 6                  | 13.65              | Male       |                        |
| <b>CG 4</b>  | 3                  | 25.5               | Female     |                        |
| <b>CG 5</b>  | 1.6                | 18.25              | Female     |                        |
| <b>CG 6</b>  | 4                  | 17.5               | Female     |                        |
| <b>CG 7</b>  | 5                  | 8.5                | Female     |                        |

**Clinical score:**

| <b>Clinical score</b> | <b>Ingestion</b>    |                    | <b>Mental</b>       |                    | <b>Nutritional</b>  |                    | <b>Vomiting</b>     |                    | <b>Feces</b>        |                    | <b>Hydration</b>    |                    |
|-----------------------|---------------------|--------------------|---------------------|--------------------|---------------------|--------------------|---------------------|--------------------|---------------------|--------------------|---------------------|--------------------|
| <b>Group</b>          | <b>First-moment</b> | <b>Last-moment</b> | <b>First-moment</b> | <b>Last-moment</b> | <b>First-moment</b> | <b>Last-moment</b> | <b>First-moment</b> | <b>Last-moment</b> | <b>First-moment</b> | <b>Last-moment</b> | <b>First-moment</b> | <b>Last-moment</b> |
| <b>IHG 1</b>          | 2                   | 2                  | 2                   | 3                  | 2                   | 2                  | 1                   | 1                  | 1                   | 1                  | 2                   | 2                  |
| <b>IHG 2</b>          | 0                   | 1                  | 2                   | 2                  | 1                   | 2                  | 1                   | 1                  | 1                   | 1                  | 1                   | 2                  |
| <b>IHG 3</b>          |                     | 1                  |                     | 2                  |                     | 2                  |                     | 1                  |                     | 1                  |                     | 2                  |
| <b>IHG 4</b>          | 1                   | 1                  | 2                   | 2                  | 3                   | 2                  | 0                   | 1                  | 1                   | 0                  | 2                   | 2                  |
| <b>IHG 5</b>          | 1                   | 1                  | 3                   | 3                  | 1                   | 1                  | 0                   | 0                  | 1                   | 1                  | 1                   | 1                  |
| <b>IHG 6</b>          | 1                   | 1                  | 2                   | 2                  | 2                   | 3                  | 1                   | 1                  | 0                   | 1                  | 2                   | 2                  |
| <b>IHG 7</b>          | 1                   | 2                  | 2                   | 3                  | 2                   | 2                  | 0                   | 1                  | 1                   | 1                  | 1                   | 2                  |
| <b>IHG 8</b>          |                     | 1                  |                     | 2                  |                     | 2                  |                     | 0                  |                     | 1                  |                     | 2                  |
| <b>Group</b>          | <b>First-moment</b> | <b>Last-moment</b> | <b>First-moment</b> | <b>Last-moment</b> | <b>First-moment</b> | <b>Last-moment</b> | <b>First-moment</b> | <b>Last-moment</b> | <b>First-moment</b> | <b>Last-moment</b> | <b>First-moment</b> | <b>Last-moment</b> |
| <b>CTG 1</b>          | 1                   | 1                  | 3                   | 2                  | 2                   | 3                  | 0                   | 1                  | 1                   | 1                  | 2                   | 2                  |
| <b>CTG 2</b>          | 1                   | 1                  | 3                   | 2                  | 2                   | 2                  | 1                   | 1                  | 1                   | 1                  | 2                   | 2                  |
| <b>CTG 3</b>          | 1                   | 1                  | 2                   | 2                  | 2                   | 1                  | 0                   | 0                  | 1                   | 1                  | 2                   | 1                  |
| <b>CTG 4</b>          | 1                   | 0                  | 2                   | 1                  | 2                   | 1                  | 1                   | 1                  | 1                   | 1                  | 1                   | 1                  |
| <b>CTG 5</b>          | 1                   | 0                  | 2                   | 2                  | 3                   | 1                  | 1                   | 1                  | 0                   | 0                  | 2                   | 1                  |
| <b>CTG 6</b>          | 2                   | 2                  | 3                   | 3                  | 3                   | 2                  | 1                   | 1                  | 1                   | 1                  | 2                   | 2                  |
| <b>CTG 7</b>          | 1                   | 1                  | 1                   | 2                  | 1                   | 1                  | 1                   | 1                  | 1                   | 1                  | 1                   | 1                  |
| <b>CTG 8</b>          | 1                   | 1                  | 3                   | 2                  | 2                   | 2                  | 1                   | 1                  | 0                   | 1                  | 2                   | 2                  |
| <b>CG</b>             | Not applicable      |                    |                     |                    |                     |                    |                     |                    |                     |                    |                     |                    |

**Laboratorial parameters - Intermittent hemodialysis group (IHG)**

**First-moment**

| <b>First-moment</b> | <b>C-reactive protein (Catalyst® device) (mg/L)</b> | <b>C-reactive protein (Life Diagnostics®) (mg/L)</b> | <b>Urea (mg/dL)</b> | <b>Creatinine (mg/dL)</b> | <b>Serum albumin (g/dL)</b> | <b>Phosphorus (mg/dL)</b> |
|---------------------|-----------------------------------------------------|------------------------------------------------------|---------------------|---------------------------|-----------------------------|---------------------------|
| <b>IHG 1</b>        | 26                                                  | 61.3                                                 | 283                 | 5.1                       | 1.8                         | 18                        |
| <b>IHG 2</b>        | 25                                                  | 7.8                                                  | 269                 | 6.4                       | 2.9                         | 31.9                      |
| <b>IHG 3</b>        | 100                                                 | 523.45                                               | 254                 | 11.5                      | 2.4                         | 13.1                      |
| <b>IHG 4</b>        |                                                     | 24.65                                                | 171                 | 6.6                       | 2.9                         | 2.7                       |
| <b>IHG 5</b>        | 54                                                  | 24.15                                                | 236                 | 6.45                      | 2.2                         | 11                        |
| <b>IHG 6</b>        | 21                                                  | 99.2                                                 | 381                 | 11.26                     | 1.8                         | 75.5                      |
| <b>IHG 7</b>        |                                                     | 214.2                                                | 521                 | 16.72                     | 2.4                         | 15.8                      |
| <b>IHG 8</b>        |                                                     | 71                                                   | 584                 | 21.6                      | 2.3                         | 31                        |

  

| <b>First-moment</b> | <b>Potassium (mEq/L)</b> | <b>Erythrocytes (/μL)</b> | <b>Total plasma protein (g/dL)</b> | <b>Platelets (/μL)</b> | <b>Total leukocytes (/μL)</b> | <b>Urinary protein to creatinine ratio</b> |
|---------------------|--------------------------|---------------------------|------------------------------------|------------------------|-------------------------------|--------------------------------------------|
| <b>IHG 1</b>        | 4                        | 2.81                      | 9                                  | 224.000                | 8.400                         | 7.2                                        |
| <b>IHG 2</b>        | 2.9                      | 6.72                      | 6.4                                | 118.000                | 6.800                         | 4.3                                        |
| <b>IHG 3</b>        | 3.9                      | 4.3                       | 7.4                                | 186.850                | 15.400                        | 2.6                                        |
| <b>IHG 4</b>        | 3.4                      | 5.47                      | 7.6                                | 383.800                | 10.700                        | 1.6                                        |
| <b>IHG 5</b>        | 4.1                      | 4.65                      | 9                                  | 297.000                | 10.800                        | 1.8                                        |
| <b>IHG 6</b>        | 4.3                      | 2.3                       | 5.4                                | 162.000                | 8.800                         | 1.8                                        |
| <b>IHG 7</b>        | 3.4                      | 2.93                      | 7                                  | 250.000                | 10.900                        | 1.4                                        |
| <b>IHG 8</b>        | 2.4                      | 2.4                       | 9.8                                | 146.450                | 10.200                        | 1.3                                        |

**Laboratorial parameters - Clinical treatment group (CTG)**

**First-moment**

| <b>First-moment</b> | <b>C-reactive protein (Catalyst® device) (mg/L)</b> | <b>C-reactive protein (Life Diagnostics®) (mg/L)</b> | <b>Urea (mg/dL)</b> | <b>Creatinine (mg/dL)</b> | <b>Serum albumin (g/dL)</b> | <b>Phosphorus (mg/dL)</b> |
|---------------------|-----------------------------------------------------|------------------------------------------------------|---------------------|---------------------------|-----------------------------|---------------------------|
| <b>CTG 1</b>        | 25                                                  | 7.8                                                  | 177                 | 5.8                       | 2.9                         | 26.9                      |
| <b>CTG 2</b>        | 11                                                  | 7.8                                                  | 291                 | 9.27                      | 2.9                         | 9.4                       |
| <b>CTG 3</b>        | 63                                                  | 232.35                                               | 232.4               | 5.7                       | 2.6                         | 13                        |
| <b>CTG 4</b>        | 30                                                  | 7.8                                                  | 417                 | 9.48                      | 2.7                         | 26                        |
| <b>CTG 5</b>        | 12                                                  | 7.8                                                  | 269.8               | 13.99                     | 3.4                         | 17.24                     |
| <b>CTG 6</b>        | 14                                                  | 7.8                                                  | 158                 | 5.2                       | 2.3                         | 8.35                      |
| <b>CTG 7</b>        | 46                                                  | 7.8                                                  | 359.4               | 11.83                     |                             | 14.63                     |
| <b>CTG 8</b>        | 38                                                  | 45.6                                                 | 245                 | 10.99                     | 2.3                         | 12.29                     |

| <b>First-moment</b> | <b>Potassium (mEq/L)</b> | <b>Erythrocytes (/μL)</b> | <b>Total plasma protein (g/dL)</b> | <b>Platelets (/μL)</b> | <b>Total leukocytes (/μL)</b> | <b>Urinary protein to creatinine ratio</b> |
|---------------------|--------------------------|---------------------------|------------------------------------|------------------------|-------------------------------|--------------------------------------------|
| <b>CTG 1</b>        | 4.3                      | 2.35                      | 7                                  | 318.000                | 10.800                        | 7.26                                       |
| <b>CTG 2</b>        | 4.2                      | 4.99                      | 7.2                                | 514.000                | 7.100                         | 1.9                                        |
| <b>CTG 3</b>        | 3.7                      | 6.61                      | 8                                  | 277.000                | 5.800                         | 3.22                                       |
| <b>CTG 4</b>        | 3.7                      | 4.29                      | 10.2                               | 308.050                | 10.800                        | 1.85                                       |
| <b>CTG 5</b>        | 4.5                      | 3.86                      | 8                                  | 358.000                | 6.900                         | 2.21                                       |
| <b>CTG 6</b>        | 4.1                      | 4.51                      | 7.8                                | 187.000                | 8.700                         | 2.62                                       |
| <b>CTG 7</b>        | 4.6                      |                           |                                    |                        |                               | 0.77                                       |
| <b>CTG 8</b>        | 5.9                      | 2.61                      | 6.8                                | 323.500                | 9.700                         | 3.14                                       |

**Laboratorial parameters - Control group (CG)**

**First-moment**

| <b>First-moment</b> | <b>C-reactive protein (Catalyst® device) (mg/L)</b> | <b>C-reactive protein (Life Diagnostics®) (mg/L)</b> | <b>Urea (mg/dL)</b> | <b>Creatinine (mg/dL)</b> | <b>Serum albumin (g/dL)</b> | <b>Phosphorus (mg/dL)</b> |
|---------------------|-----------------------------------------------------|------------------------------------------------------|---------------------|---------------------------|-----------------------------|---------------------------|
| CG 1                | 4                                                   | 44.15                                                | 31                  | 1.11                      | 3.7                         | 3.2                       |
| CG 2                | 3                                                   | 41.15                                                | 43                  | 1.24                      | 3.6                         | 3                         |
| CG 3                | 2                                                   | 44.35                                                | 28                  | 1.4                       | 3.4                         | 2.1                       |
| CG 4                | 1                                                   | 47.15                                                | 39                  | 1.13                      | 4.1                         | 3.3                       |
| CG 5                | 6                                                   | 46.65                                                | 53                  | 1.21                      | 3.5                         | 3.2                       |
| CG 6                | 5                                                   | 36.85                                                | 75                  | 1.21                      | 3.5                         | 3.1                       |
| CG 7                | 1                                                   | 40.55                                                | 36                  | 0.95                      | 3.9                         | 3.9                       |

  

| <b>First-moment</b> | <b>Potassium (mEq/L)</b> | <b>Erythrocytes (/μL)</b> | <b>Total plasma protein (g/dL)</b> | <b>Platelets (/μL)</b> | <b>Total leukocytes (/μL)</b> | <b>Urinary protein to creatinine ratio</b> |
|---------------------|--------------------------|---------------------------|------------------------------------|------------------------|-------------------------------|--------------------------------------------|
| CG 1                | 2.9                      | 7.170                     | 6.2                                | 227.000                | 6.530                         | 0.06                                       |
| CG 2                | 3                        | 6.290                     | 7.2                                |                        | 7.870                         | 0.07                                       |
| CG 3                | 3.1                      | 7.400                     | 7                                  | 173.000                | 5.500                         | 0.05                                       |
| CG 4                | 2.8                      | 7.860                     | 8.4                                | 257.000                | 6.100                         | 0.17                                       |
| CG 5                | 3.2                      |                           | 6.2                                | 196.950                | 9.800                         | 0.07                                       |
| CG 6                | 3.2                      |                           | 6.6                                | 170.000                | 6.300                         | 0.09                                       |
| CG 7                | 3.5                      | 6.880                     | 7.2                                | 338.000                | 7.300                         | 0.2                                        |

**Laboratorial parameters - Intermittent hemodialysis group (IHG)**

**Last-moment**

| <b>Last-moment</b> | <b>C-reactive protein (Catalyst® device) (mg/L)</b> | <b>C-reactive protein (Life Diagnostics®) (mg/L)</b> | <b>Urea (mg/dL)</b> | <b>Creatinine (mg/dL)</b> | <b>Serum albumin (g/dL)</b> | <b>Phosphorus (mg/dL)</b> |
|--------------------|-----------------------------------------------------|------------------------------------------------------|---------------------|---------------------------|-----------------------------|---------------------------|
| <b>IHG 1</b>       | 56                                                  | 7.8                                                  | 177                 | 6.3                       | 2                           | 15.2                      |
| <b>IHG 2</b>       | 25                                                  | 7.8                                                  | 208                 | 4.5                       | 2.6                         | 21.8                      |
| <b>IHG 3</b>       | 83                                                  | 122                                                  | 202                 | 6.1                       | 2.6                         | 10.4                      |
| <b>IHG 4</b>       | 58                                                  | 80.5                                                 | 143                 | 6.9                       | 2.6                         | 5.4                       |
| <b>IHG 5</b>       | 17                                                  | 55.9                                                 | 130                 | 3.74                      | 2.5                         | 5.3                       |
| <b>IHG 6</b>       | 142                                                 | 89.5                                                 | 179                 | 7.4                       | 2.7                         | 12                        |
| <b>IHG 7</b>       | 34                                                  | 7.8                                                  | 153                 | 11.02                     | 2.9                         | 11.5                      |
| <b>IHG 8</b>       | 63                                                  | 85.25                                                | 248.2               | 12.43                     | 2.5                         | 16.42                     |

| <b>Last-moment</b> | <b>Potassium (mEq/L)</b> | <b>Erythrocytes (/μL)</b> | <b>Total plasma protein (g/dL)</b> | <b>Platelets (/μL)</b> | <b>Total leukocytes (/μL)</b> | <b>Urinary protein to creatinine ratio</b> |
|--------------------|--------------------------|---------------------------|------------------------------------|------------------------|-------------------------------|--------------------------------------------|
| <b>IHG 1</b>       | 6                        | 2.79                      | 8.6                                | 244.000                | 17.500                        | 7.9                                        |
| <b>IHG 2</b>       | 3.1                      | 3.1                       | 5.4                                | 389.000                | 12.700                        | 7.8                                        |
| <b>IHG 3</b>       | 4.1                      | 3.42                      | 6.6                                | 290.000                | 11.500                        | 1                                          |
| <b>IHG 4</b>       | 3.6                      | 4.3                       | 7.4                                | 383.000                | 17.200                        | 1                                          |
| <b>IHG 5</b>       | 3.9                      | 3.71                      | 7.4                                | 302.000                | 11.800                        | 0.7                                        |
| <b>IHG 6</b>       | 7                        | 3.38                      | 7.8                                | 153.000                | 16.700                        | 4.9                                        |
| <b>IHG 7</b>       | 4.8                      | 2.72                      | 7                                  | 234.000                | 10.990                        | 1.6                                        |
| <b>IHG 8</b>       | 4                        | 2.35                      | 9.4                                | 231.000                | 17.100                        | 1.45                                       |

**Laboratorial parameters - Clinical treatment group (CTG)**

**Last-moment**

| <b>Last-moment</b> | <b>C-reactive protein (Catalyst® device) (mg/L)</b> | <b>C-reactive protein (Life Diagnostics®) (mg/L)</b> | <b>Urea (mg/dL)</b> | <b>Creatinine (mg/dL)</b> | <b>Serum albumin (g/dL)</b> | <b>Phosphorus (mg/dL)</b> |
|--------------------|-----------------------------------------------------|------------------------------------------------------|---------------------|---------------------------|-----------------------------|---------------------------|
| <b>CTG 1</b>       | 9                                                   | 37.6                                                 | 218                 | 9.3                       | 2.9                         | 32.6                      |
| <b>CTG 2</b>       | 27                                                  | 49.2                                                 | 356.3               | 9.39                      | 2.7                         | 15                        |
| <b>CTG 3</b>       |                                                     | 47.9                                                 | 322.6               | 8.1                       | 2.8                         | 25                        |
| <b>CTG 4</b>       | 167                                                 | 317.1                                                | 527                 | 13.05                     | 2.5                         | 29                        |
| <b>CTG 5</b>       | 8                                                   | 32.05                                                | 384.9               | 20.72                     | 2.9                         | 29.59                     |
| <b>CTG 6</b>       | 16                                                  | 52.85                                                | 217.9               | 6.7                       | 2.1                         | 11.87                     |
| <b>CTG 7</b>       | 70                                                  | 78.75                                                | 345.1               | 9.66                      | 2.6                         | 12.45                     |
| <b>CTG 8</b>       | 15                                                  | 41.5                                                 | 303.7               | 18.08                     | 2.4                         | 16.62                     |

  

| <b>Last-moment</b> | <b>Potassium (mEq/L)</b> | <b>Erythrocytes (/μL)</b> | <b>Total plasma protein (g/dL)</b> | <b>Platelets (/μL)</b> | <b>Total leukocytes (/μL)</b> | <b>Urinary protein to creatinine ratio</b> |
|--------------------|--------------------------|---------------------------|------------------------------------|------------------------|-------------------------------|--------------------------------------------|
| <b>CTG 1</b>       | 4.3                      | 3.53                      | 7                                  | 434.300                | 8.600                         | 5.7                                        |
| <b>CTG 2</b>       | 4.1                      | 3.64                      | 7                                  | 441.000                | 7.200                         | 2.5                                        |
| <b>CTG 3</b>       | 3.7                      | 7.4                       | 8                                  | 331.000                | 4.600                         | 2.5                                        |
| <b>CTG 4</b>       | 4.1                      | 3.94                      | 9.6                                | 346.000                | 17.700                        | 1.6                                        |
| <b>CTG 5</b>       | 5.1                      | 3.35                      | 6.4                                | 179.000                | 11.200                        | 1.41                                       |
| <b>CTG 6</b>       | 4.1                      | 4.52                      | 7.8                                | 187.000                | 5.900                         | 3.27                                       |
| <b>CTG 7</b>       | 5.3                      | 3.54                      | 8.4                                | 98.000                 | 12.700                        | 3.65                                       |
| <b>CTG 8</b>       | 6.6                      | 2.37                      | 6.8                                | 372.000                | 13.100                        | 1.9                                        |

**Laboratorial parameters - Control group (CG)**

**Last-moment**

| <b>Last-moment</b> | <b>C-reactive protein (Catalyst® device) (mg/L)</b> | <b>C-reactive protein (Life Diagnostics®) (mg/L)</b> | <b>Urea (mg/dL)</b> | <b>Creatinine (mg/dL)</b> | <b>Serum albumin (g/dL)</b> | <b>Phosphorus (mg/dL)</b> |
|--------------------|-----------------------------------------------------|------------------------------------------------------|---------------------|---------------------------|-----------------------------|---------------------------|
| <b>CG 1</b>        | 4                                                   | 44.15                                                | 31                  | 1.11                      | 3.7                         | 3.2                       |
| <b>CG 2</b>        | 3                                                   | 41.15                                                | 43                  | 1.24                      | 3.6                         | 3                         |
| <b>CG 3</b>        | 2                                                   | 44.35                                                | 28                  | 1.4                       | 3.4                         | 2.1                       |
| <b>CG 4</b>        | 1                                                   | 47.15                                                | 39                  | 1.13                      | 4.1                         | 3.3                       |
| <b>CG 5</b>        | 6                                                   | 46.65                                                | 53                  | 1.21                      | 3.5                         | 3.2                       |
| <b>CG 6</b>        | 5                                                   | 36.85                                                | 75                  | 1.21                      | 3.5                         | 3.1                       |
| <b>CG 7</b>        | 1                                                   | 40.55                                                | 36                  | 0.95                      | 3.9                         | 3.9                       |

  

| <b>Last-moment</b> | <b>Potassium (mEq/L)</b> | <b>Erythrocytes (/μL)</b> | <b>Total plasma protein (g/dL)</b> | <b>Platelets (/μL)</b> | <b>Total leukocytes (/μL)</b> | <b>Urinary protein to creatinine ratio</b> |
|--------------------|--------------------------|---------------------------|------------------------------------|------------------------|-------------------------------|--------------------------------------------|
| <b>CG 1</b>        | 2.9                      | 7.170                     | 6.2                                | 227.000                | 6.530                         | 0.06                                       |
| <b>CG 2</b>        | 3                        | 6.290                     | 7.2                                |                        | 7.870                         | 0.07                                       |
| <b>CG 3</b>        | 3.1                      | 7.400                     | 7                                  | 173.000                | 5.500                         | 0.05                                       |
| <b>CG 4</b>        | 2.8                      | 7.860                     | 8.4                                | 257.000                | 6.100                         | 0.17                                       |
| <b>CG 5</b>        | 3.2                      |                           | 6.2                                | 196.950                | 9.800                         | 0.07                                       |
| <b>CG 6</b>        | 3.2                      |                           | 6.6                                | 170.000                | 6.300                         | 0.09                                       |
| <b>CG 7</b>        | 3.5                      | 6.880                     | 7.2                                | 338.000                | 7.300                         | 0.2                                        |
